# Supplementary material for: Bioprospecting from Marine Sediments of New Brunswick, Canada: Exploring the Relationship between Total Bacterial Diversity and Actinobacteria Diversity
Source: PubMed Central journal article supplement (PMC3944522; doi:10.3390/md12020899), 2014-02-13

## Supplementary Information

**Table S1.** Phylum level composition of bacterial communities in eight New Brunswick sediments.

| Phylum                 | IB * | IB%   | 2B*  | 2B%   | 3B * | 3B%   | 4B * | 4B%   | 5B * | 5B%   | 6B * | 6B%   | 7B * | 7B%   | 8B * | 8B%   |
|------------------------|------|-------|------|-------|------|-------|------|-------|------|-------|------|-------|------|-------|------|-------|
| <i>Acidobacteria</i>   | 270  | 4.0   | 248  | 5.3   | 383  | 6.4   | 81   | 1.0   | 63   | 1.4   | 73   | 1.4   |      |       | 474  | 7.5   |
| <i>Actinobacteria</i>  | 542  | 8.0   | 111  | 2.4   | 181  | 3.0   |      |       |      |       |      |       |      |       | 168  | 2.7   |
| <i>Bacteroidetes</i>   | 1882 | 27.7  | 1133 | 24.4  | 1196 | 20.1  | 1645 | 20.9  | 879  | 20.1  | 990  | 18.7  | 1450 | 39.5  | 2012 | 32.0  |
| <i>Chlorobi</i>        |      |       |      |       |      |       |      |       | 54   | 1.2   | 66   | 1.2   |      |       |      |       |
| <i>Planctomycetes</i>  | 88   | 1.3   |      |       |      |       |      |       |      |       |      |       |      |       |      |       |
| <i>Proteobacteria</i>  | 2284 | 33.6  | 1851 | 39.9  | 2468 | 41.4  | 4349 | 55.4  | 2430 | 55.4  | 3020 | 56.9  | 1523 | 41.5  | 2510 | 39.9  |
| <i>Verrucomicrobia</i> | 307  | 4.5   |      |       |      |       |      |       |      |       |      |       | 133  | 3.6   | 65   | 1.0   |
| Unclassified Bacteria  | 1367 | 20.1  | 1205 | 26.0  | 1581 | 26.5  | 1474 | 18.8  | 824  | 18.8  | 1058 | 19.9  | 487  | 13.3  | 926  | 14.7  |
| “Rare Phyla”           | 51   | 0.8   | 95   | 2.0   | 148  | 2.5   | 223  | 2.8   | 133  | 3.0   | 99   | 1.9   | 79   | 2.2   | 128  | 2.0   |
| Total                  | 6791 | 100.0 | 4643 | 100.0 | 5957 | 100.0 | 7856 | 100.0 | 4383 | 100.0 | 5306 | 100.0 | 3672 | 100.0 | 6283 | 100.0 |

\* Denotes number of sequences.

**Table S2.** Number of sequences represented in the “Rare Phyla” group presented in Table S1.

| Phylum                  | IB | 2B | 3B | 4B | 5B | 6B | 7B | 8B |
|-------------------------|----|----|----|----|----|----|----|----|
| <i>Acidobacteria</i>    |    |    |    |    |    |    | 5  |    |
| <i>Actinobacteria</i>   |    |    |    | 62 | 39 | 33 | 13 |    |
| <i>Armatimonadetes</i>  | 1  |    |    |    |    |    |    | 9  |
| <i>Chlorobi</i>         | 13 | 2  | 5  |    |    |    |    | 5  |
| <i>Chloroflexi</i>      | 3  | 4  | 4  | 12 | 27 | 8  | 6  | 20 |
| <i>Fusobacteria</i>     |    |    | 3  | 1  | 1  |    | 1  |    |
| <i>Gemmatimonadetes</i> | 9  |    | 1  |    | 1  |    |    | 9  |
| <i>Lentisphaerae</i>    | 4  | 2  |    | 2  | 2  |    | 12 | 4  |
| <i>Nitrospira</i>       | 5  | 1  | 22 |    |    |    | 2  | 36 |
| <i>Planctomycetes</i>   |    | 37 | 55 | 52 | 18 | 21 | 9  | 28 |
| <i>Spirochaetes</i>     |    |    |    | 2  |    |    | 1  |    |
| <i>Verrucomicrobia</i>  |    | 46 | 51 | 73 | 33 | 26 |    |    |

**Table S2. Cont.**

|                                 |    |    |     |     |     |    |    |     |   |
|---------------------------------|----|----|-----|-----|-----|----|----|-----|---|
| <i>Cyanobacteriachloroplast</i> |    |    |     |     |     |    |    |     | 7 |
| <i>Firmicutes</i>               | 12 | 2  | 4   | 16  | 9   | 9  | 22 | 10  |   |
| OD1                             | 2  |    | 1   |     |     |    |    | 3   |   |
| TM7                             | 2  | 1  | 1   |     |     |    |    | 4   |   |
| WS3                             |    |    | 1   | 3   | 3   | 2  | 1  |     |   |
| Total                           | 51 | 95 | 148 | 223 | 133 | 99 | 79 | 128 |   |

**Table S3.** Family level taxonomic composition with in the Order Actinomycetales.

| Family within the Order<br><i>Actinomycetales</i> | 1B *             | 1B%   | 2B * | 2B%   | 3B *             | 3B%   | 4B * | 4B%   | 5B * | 5B%   | 6B * | 6B%   | 7B * | 7B%   | 8B * | 8B%   |
|---------------------------------------------------|------------------|-------|------|-------|------------------|-------|------|-------|------|-------|------|-------|------|-------|------|-------|
| <i>Cellulomonadaceae</i>                          | 4.0              | 1.0   | 1.0  | 2.0   |                  |       | 6.0  | 40.0  |      |       |      |       |      |       |      |       |
| <i>Demequinaceae</i>                              | 17.0             | 4.2   | 2.0  | 4.0   |                  |       |      |       |      |       |      |       |      |       | 1.0  | 2.3   |
| <i>Geodermatophilaceae</i>                        | 4.0              | 1.0   | 1.0  | 2.0   | 4.0              | 3.8   |      |       |      |       |      |       |      |       | 2.0  | 4.5   |
| <i>Intrasporangiaceae</i>                         | 10.0             | 2.5   | 1.0  | 2.0   |                  |       |      |       |      |       |      |       |      |       | 3.0  | 6.8   |
| <i>Kineosporiaceae</i>                            |                  |       |      |       |                  |       |      |       |      |       |      |       |      |       | 2.0  | 4.5   |
| <i>Microbacteriaceae</i>                          | 116.0            | 28.9  | 3.0  | 6.0   | 14.0             | 13.2  |      |       |      |       |      |       |      |       | 6.0  | 13.6  |
| <i>Micrococcaceae</i>                             | 7.0              | 1.7   | 3.0  | 6.0   | 6.0              | 5.7   | 1.0  | 6.7   |      |       |      |       |      |       | 1.0  | 2.3   |
| <i>Nakamurellaceae</i>                            |                  |       | 1.0  | 2.0   |                  |       |      |       |      |       |      |       |      |       |      |       |
| <i>Nocardioideaceae</i>                           | 122.0            | 30.3  | 9.0  | 18.0  | 31.0             | 29.2  | 6.0  | 40.0  |      |       |      |       |      |       | 16.0 | 36.4  |
| <i>Propionibacteriaceae</i>                       | 5.0              | 1.2   |      |       | 2.0              | 1.9   |      |       |      |       |      |       |      |       |      |       |
| <i>Pseudonocardiaceae</i>                         | 7.0              | 1.7   |      |       |                  |       |      |       |      |       |      |       |      |       |      |       |
| <i>Streptomycetaceae</i>                          | 6.0              | 1.5   |      |       |                  |       |      |       |      |       |      |       |      |       |      |       |
| Unclassified Actinomycetales                      | 100.0            | 24.9  | 29.0 | 58.0  | 47.0             | 44.3  | 2.0  | 13.3  | 5.0  | 100.0 | 3.0  | 100.0 | 1.0  | 100.0 | 13.0 | 29.5  |
| “Rare Family”                                     | 4.0 <sup>a</sup> | 1.0   |      |       | 2.0 <sup>b</sup> | 1.9   |      |       |      |       |      |       |      |       |      |       |
| Total                                             | 402.0            | 100.0 | 50.0 | 100.0 | 106.0            | 100.0 | 15.0 | 100.0 | 5.0  | 100.0 | 3.0  | 100.0 | 1.0  | 100.0 | 44.0 | 100.0 |

\* Denotes number of sequences; <sup>a</sup> 1B rare family: 1 Micromonosporaceae, 1 Kineosporiaceae, 1 Nakamurellaceae, 1 Nocardioideaceae; <sup>b</sup> 3B rare family: 1 Pseudonocardiaceae, 1 Intrasporangiaceae.

**Table S4.** Closest GenBank match of sequence groups (>99% sequence identity) and unique isolates. \* Isolate name in brackets indicates the reference isolate from each sequence group that was deposited in GenBank.

| Sequence Group/Strain Designation | Number of strains | Sequence length (bp) | Closest GenBank Match (Accession number)                                                         | % Identity | % Query coverage | Genbank accession number * |
|-----------------------------------|-------------------|----------------------|--------------------------------------------------------------------------------------------------|------------|------------------|----------------------------|
| 1                                 | 123               | 508                  | Streptomyces griseus strain ABRIINW 13 16S ribosomal RNA gene, partial sequence (HQ597007.1)     | 100        | 89               | KF646049 (6BA6)            |
| 2                                 | 2                 | 461                  | Streptomyces sp. 220297 16S ribosomal RNA gene, partial sequence (GU130099.1)                    | 99         | 98               | KF646050 (1BA12)           |
| 3                                 | 5                 | 462                  | Streptomyces caeruleus strain NRRL 2449 16S ribosomal RNA gene, partial sequence (EF178698.1)    | 98         | 99               | KF646051 (3BD4)            |
| 4                                 | 19                | 458                  | Streptomyces sp. SXY49 16S ribosomal RNA gene, partial sequence (GU045532.1)                     | 99         | 98               | KF646052 (4BD8)            |
| 5                                 | 4                 | 454                  | Streptomyces azureus strain NRRL B-2655 16S ribosomal RNA gene, partial sequence (NR_044136.1)   | 99         | 99               | KF646053 (1BB9)            |
| 6                                 | 53                | 465                  | Streptomyces albidoflavus strain HD-109 16S ribosomal RNA gene, partial sequence (EF620361.1)    | 99         | 97               | KF646054 (5BC6)            |
| 7                                 | 7                 | 459                  | Streptomyces sp. SXY124 16S ribosomal RNA gene, partial sequence (GU045539.1)                    | 99         | 98               | KF646055 (7BF5)            |
| 8                                 | 13                | 458                  | Streptomyces drozdowiczii partial 16S rRNA gene, isolate PhyCEm-1349 (AM921646.1)                | 99         | 98               | KF646056 (3BC11)           |
| 9                                 | 20                | 454                  | Streptomyces baarnensis strain NRRL B-1902 16S ribosomal RNA gene, partial sequence (EF178688.1) | 99         | 100              | KF646059 (2BA6)            |
| 10                                | 7                 | 451                  | Streptomyces sp. SirexAA-E, complete genome (CP002993.1)                                         | 99         | 99               | KF646079 (6BC12)           |
| 11                                | 2                 | 844                  | Streptomyces sp. BK178 partial 16S rRNA gene, strain BK178 (FR692110.1)                          | 99         | 99               | KF646064 (3BG7)            |
| 12                                | 7                 | 453                  | Streptomyces albidoflavus strain HD-109 16S ribosomal RNA gene, partial sequence (EF620361.1)    | 99         | 99               | KF646067 (4BC6)            |
| 13                                | 11                | 459                  | Streptomyces sp. SirexAA-E, complete genome (CP002993.1)                                         | 99         | 97               | KF646085 (7BF12)           |
| 14                                | 2                 | 455                  | Streptomyces lavendulae strain NRRL B-1230 16S ribosomal RNA gene, partial sequence (HQ426713.1) | 99         | 100              | KF646063 (3BG2)            |
| 15                                | 5                 | 449                  | Streptomyces sp. HB108 16S ribosomal RNA gene, partial sequence (GU213496.1)                     | 99         | 98               | KF646070 (5BA5)            |
| 16                                | 5                 | 454                  | Streptomyces flavogriseus partial 16S rRNA gene, type strain CBS 101.34T (AJ494864.1)            | 99         | 98               | KF646061 (2BG3)            |
| 17                                | 4                 | 449                  | Streptomyces drozdowiczii partial 16S rRNA gene, isolate PhyCEm-1258 (AM921645.1)                | 100        | 99               | KF646075 (5BC2)            |
| 18                                | 3                 | 453                  | Streptomyces sp. AKB-2008-ET11 partial 16S rRNA gene, strain AKB-2008-ET11 (AM988883.1)          | 99         | 99               | KF646078 (6BC5)            |
| 19                                | 12                | 458                  | Streptomyces sp. HBUM80670 16S ribosomal RNA gene, partial sequence (EU119202.1)                 | 99         | 98               | KF646076 (6BA9)            |
| 20                                | 5                 | 448                  | Streptomyces drozdowiczii partial 16S rRNA gene, isolate PhyCEm-1258 (AM921645.1)                | 99         | 100              | KF646065 (4BC2)            |

Table S4. Cont.

|      |    |      |                                                                                                                                         |     |     |                  |
|------|----|------|-----------------------------------------------------------------------------------------------------------------------------------------|-----|-----|------------------|
| 21   | 2  | 875  | Streptomyces caeruleus strain NRRL 2449 16S ribosomal RNA gene, partial sequence (EF178698.1)                                           | 98  | 99  | KF646068 (4BD5)  |
| 22   | 2  | 446  | Streptomyces sp. DSM 21069 16S ribosomal RNA gene, partial sequence (FJ872524.1)                                                        | 99  | 100 | KF646069 (4BD7)  |
| 23   | 6  | 454  | Streptomyces sp. ME02-6978.2d 16S ribosomal RNA gene, complete sequence (EU080941.1)                                                    | 99  | 98  | KF646060 (2BB1)  |
| 24   | 3  | 449  | Streptomyces phaeochromogenes strain NRRL B-2031 16S ribosomal RNA gene, partial sequence                                               | 98  | 100 | KF646082 (7BE9)  |
| 25   | 2  | 418  | Streptomyces peucetius gene for 16S rRNA, partial sequence (AB249907.1)                                                                 | 99  | 100 | KF646071 (5BA11) |
| 26   | 11 | 451  | Streptomyces sp. HB116 16S ribosomal RNA gene, partial sequence (GU213500.1)                                                            | 100 | 99  | KF646083 (7BE12) |
| 27   | 2  | 455  | Streptomyces sp. SirexAA-E, complete genome (CP002993.1)                                                                                | 99  | 98  | KF646074 (5BC1)  |
| 28   | 3  | 452  | Streptomyces sp. VTT E-99-1326 (A4) 16S ribosomal RNA gene, partial sequence (AF429390.1)                                               | 100 | 99  | KF646077 (6BB7)  |
| 29   | 14 | 456  | Streptomyces bottropensis strain cfcc3173 16S ribosomal RNA gene, partial sequence (GQ258687.1)                                         | 99  | 99  | KF646058 (2BA2)  |
| 30   | 2  | 447  | Streptomyces globosus strain 12620-1 16S ribosomal RNA gene, partial sequence (EF371433.1)                                              | 99  | 100 | KF646081 (7BE6)  |
| 31   | 6  | 461  | Streptomyces sp. AKB-2008-ET11 partial 16S rRNA gene, strain AKB-2008-ET11 (AM988883.1)                                                 | 99  | 98  | KF646087 (8BC10) |
| 32   | 4  | 450  | Streptomyces caeruleus strain NRRL 2449 16S ribosomal RNA gene, partial sequence (EF178698.1)                                           | 99  | 98  | KF646072 (5BB1)  |
| 33   | 6  | 517  | Streptomyces sp. 219840 16S ribosomal RNA gene, partial sequence (HQ992732.1)                                                           | 99  | 87  | KF646086 (8BA6)  |
| 34   | 7  | 456  | Streptomyces sp. 219840 16S ribosomal RNA gene, partial sequence (HQ992732.1)                                                           | 99  | 99  | KF646057 (1BD9)  |
| 35   | 9  | 463  | Streptomyces griseus strain ABRIINW 13 16S ribosomal RNA gene, partial sequence (HQ597007.1)                                            | 99  | 98  | KF646062 (3BD11) |
| 36   | 20 | 544  | Streptomyces sp. ME01-21h 16S ribosomal RNA gene, complete sequence (EU080953.1)                                                        | 100 | 82  | KF646073 (5BB10) |
| 37   | 4  | 439  | Nocardiopsis dassonvillei subsp. dassonvillei DSM 43111 chromosome 2, complete sequence (CP002041.1)                                    | 99  | 100 | KF646066 (4BC3)  |
| 38   | 3  | 450  | Streptomyces peucetius strain JCM 9920 16S ribosomal RNA,<br>partial sequence >dbj AB045887.1  Streptomyces peucetius gene for 16S Rrna | 99  | 96  | KF646080 (7BB10) |
| 39   | 2  | 510  | Streptomyces flavogriseus ATCC 33331, complete genome (CP002475.1)                                                                      | 100 | 86  | KF646084 (7BF2)  |
| 1BA3 | 1  | 452  | Streptomyces tritolerans strain DAS 165 16S ribosomal RNA gene, partial sequence (DQ345779.2)                                           | 99  | 100 | KF646009         |
| 1BB1 | 1  | 1515 | Streptomyces sp. ME01-21h 16S ribosomal RNA gene, complete sequence (EU080953.1)                                                        | 99  | 100 | KF646008         |
| 1BC7 | 1  | 450  | Streptomyces sp. HB110 16S ribosomal RNA gene, partial sequence (GU213497.1)                                                            | 99  | 99  | KF646001         |

Table S4. Cont.

|       |   |      |                                                                                               |    |     |          |
|-------|---|------|-----------------------------------------------------------------------------------------------|----|-----|----------|
| 1BD6  | 1 | 461  | Streptomyces sp. AKB-2008-ET11 partial 16S rRNA gene, strain AKB-2008-ET11 (AM988883.1)       | 99 | 98  | KF646002 |
| 1BE1  | 1 | 438  | Streptomyces griseus strain ABRIINW 13 16S ribosomal RNA gene, partial sequence (HQ597007.1)  | 98 | 100 | KF646003 |
| 1BE3  | 1 | 461  | Streptomyces albidoflavus strain HD-109 16S ribosomal RNA gene, partial sequence (EF620361.1) | 98 | 98  | KF646004 |
| 1BE5  | 1 | 435  | Streptomyces sp. HB184 16S ribosomal RNA gene, partial sequence (GQ863916.1)                  | 99 | 100 | KF646005 |
| 1BE11 | 1 | 455  | Streptomyces sp. ME01-21h 16S ribosomal RNA gene, complete sequence (EU080953.1)              | 99 | 99  | KF646006 |
| 2BA12 | 1 | 456  | Streptomyces bikiniensis strain DSM 40581 16S ribosomal RNA, partial (NR_026177.1)            | 98 | 98  | KF646007 |
| 2BB11 | 1 | 446  | Streptomyces albidoflavus strain HD-109 16S ribosomal RNA gene, partial (EF620361.1)          | 99 | 98  | KF646010 |
| 2BC11 | 1 | 443  | Streptomyces badius strain NRRL B-2567 16S ribosomal RNA, partial sequence (NR_043350.1)      | 98 | 97  | KF646011 |
| 2BD2  | 1 | 318  | Streptomyces sp. JJB-6 16S ribosomal RNA gene, partial sequence (GU132497.1)                  | 99 | 100 | KF646012 |
| 2BD3  | 1 | 320  | Streptomyces flavogriseus ATCC 33331, complete genome (CP002475.1)                            | 98 | 100 | KF646013 |
| 2BD11 | 1 | 386  | Streptomyces violascens strain S11A-1 16S ribosomal RNA gene, partial (HQ238294.1)            | 99 | 100 | KF646014 |
| 2BE8  | 1 | 453  | Streptomyces sp. ME01-21h 16S ribosomal RNA gene, complete sequence (EU080953.1)              | 99 | 98  | KF646015 |
| 2BF1  | 1 | 448  | Streptomyces sp. MI-BOB partial 16S rRNA gene, isolate MI-BOB (FN550147.1)                    | 99 | 99  | KF646016 |
| 2BMA3 | 1 | 361  | Nocardiopsis sp. TFS72-17 16S ribosomal RNA gene, partial sequence (HM001279.1)               | 99 | 100 | KF646017 |
| 3BA6  | 1 | 455  | Streptomyces parvus partial 16S rRNA gene, strain moss18, isolate (FR846235.1)                | 99 | 98  | KF646018 |
| 3BA9  | 1 | 453  | Streptomyces sp. 220297 16S ribosomal RNA gene, partial sequence (GU130099.1)                 | 99 | 99  | KF646019 |
| 3BA11 | 1 | 364  | Streptomyces violascens strain S11A-1 16S ribosomal RNA gene, partial (HQ238294.1)            | 99 | 100 | KF646020 |
| 3BB11 | 1 | 366  | Streptomyces sp. KLBMP 1072 16S ribosomal RNA gene, partial sequence (HM153776.1)             | 99 | 100 | KF646021 |
| 3BD2  | 1 | 446  | Streptomyces flavogriseus partial 16S rRNA gene, strain 10, clone chit_5 (FR832623.1)         | 99 | 100 | KF646022 |
| 3BD3  | 1 | 381  | Streptomyces sp. TN256 partial 16S rRNA gene, strain TN256 (FN687758.1)                       | 99 | 100 | KF646023 |
| 3BD8  | 1 | 456  | Streptomyces sp. AKB-2008-LO6 partial 16S rRNA gene, strain AKB- (AM988888.1)                 | 99 | 96  | KF646024 |
| 3BD10 | 1 | 448  | Streptomyces drozdowiczii strain NRRL B-24297 16S ribosomal RNA gene (EF654097.1)             | 99 | 99  | KF646025 |
| 3BE9  | 1 | 451  | Streptomyces subrutilus strain 173270 16S ribosomal RNA gene, partial (EU570663.1)            | 99 | 98  | KF646026 |
| 3BF2  | 1 | 444  | Promicromonospora sp. ME02-6983B 16S ribosomal RNA gene, complete (EU080946.1)                | 99 | 100 | KF646027 |
| 3BF6  | 1 | 1491 | Streptomyces sp. VTT E-99-1335 (B323) 16S ribosomal RNA gene, partial sequence (AF429399.1)   | 99 | 100 | KF646028 |
| 3BG8  | 1 | 376  | Actinoalloteichus sp. HB272 16S ribosomal RNA gene, partial sequence (GQ863923.1)             | 99 | 99  | KF646029 |
| 3BG9  | 1 | 446  | Streptomyces sp. SXY49 16S ribosomal RNA gene, partial sequence (GU045532.1)                  | 99 | 99  | KF646030 |
| 4BA12 | 1 | 455  | Streptomyces sp. AKB-2008-ET11 partial 16S rRNA gene, strain AKB (AM988883.1)                 | 99 | 98  | KF646031 |

Table S4. Cont.

|       |   |      |                                                                                             |     |     |          |
|-------|---|------|---------------------------------------------------------------------------------------------|-----|-----|----------|
| 4BB1  | 1 | 447  | Streptomyces flavogriseus partial 16S rRNA gene, strain 10, clone chit_5 (FR832623.1)       | 99  | 100 | KF646032 |
| 4BB9  | 1 | 450  | Streptomyces albus subsp. albus gene for 16S Rna (AB045884.1)                               | 99  | 97  | KF646033 |
| 4BD1  | 1 | 375  | Streptomyces violascens strain G8A-24 16S ribosomal RNA gene, partial sequence (HQ238409.1) | 99  | 100 | KF646034 |
| 5BA3  | 1 | 1494 | Streptomyces sp. VTT E-99-1336 (B329) 16S ribosomal RNA gene, partial sequence (AF429400.1) | 99  | 100 | KF646035 |
| 5BB4  | 1 | 447  | Streptomyces sp. SXY83 16S ribosomal RNA gene, partial sequence (GU045536.1)                | 99  | 100 | KF646036 |
| 5BC4  | 1 | 407  | Streptomyces griseus strain ABRIINW 13 16S ribosomal RNA gene, partial (HQ597007.1)         | 99  | 100 | KF646037 |
| 5BMB1 | 1 | 514  | Promicromonospora sp. ME02-6983B 16S ribosomal RNA gene, complete sequence (EU080946.1)     | 99  | 87  | KF646038 |
| 6BA10 | 1 | 436  | Streptomyces griseus strain DSM 40931 16S ribosomal RNA gene, partial (GU383217.1)          | 99  | 99  | KF646039 |
| 6BC4  | 1 | 447  | Streptomyces flavogriseus partial 16S rRNA gene, strain 10, clone chit (FR832623.1)         | 99  | 100 | KF646040 |
| 6BMA7 | 1 | 401  | Streptomyces sp. HB110 16S ribosomal RNA gene, partial sequence (GU213497.1)                | 99  | 100 | KF646041 |
| 7BA11 | 1 | 441  | Streptomyces sp. HB132 16S ribosomal RNA gene, partial sequence (GQ863908.1)                | 98  | 100 | KF646042 |
| 7BB12 | 1 | 448  | Streptomyces sp. ME02-6979.3a 16S ribosomal RNA gene, complete (EU080943.1)                 | 99  | 98  | KF646043 |
| 7BC7  | 1 | 440  | Streptomyces sp. L083 16S ribosomal RNA gene, partial sequence (EU135902.1)                 | 99  | 99  | KF646044 |
| 7BD3  | 1 | 382  | Streptomyces sp. MS218 16S ribosomal RNA gene, partial sequence (EU908199.1)                | 98  | 100 | KF646045 |
| 7BD4  | 1 | 509  | Streptomyces luridiscabiei strain S63 16S ribosomal RNA, complete sequence (NR_025155.1)    | 100 | 87  | KF646000 |
| 8BA1  | 1 | 459  | Streptomyces albidoflavus strain HD-109 16S ribosomal RNA gene, partial (EF620361.1)        | 99  | 99  | KF646046 |
| 8BC4  | 1 | 458  | Streptomyces sp. MS1/7 16S ribosomal RNA gene, partial sequence (AY550275.2)                | 98  | 99  | KF646047 |
| 8BC6  | 1 | 452  | Streptomyces drozdowiczii partial 16S Rna gene, isolate PhyCEm-1258 (AM921645.1)            | 99  | 99  | KF646048 |

**Table S5.** Composition of sequence groups consisting of strains which share >99% 16S rRNA sequence identity.

| Sequence group | Number of strains | Strains in sequence group<br><i>Isolate location denoted by first two characters of strain name</i>                                                                                                                                                                                                                                                                                                                                                                                                                                                                                                                                                                                                                                                                                           |
|----------------|-------------------|-----------------------------------------------------------------------------------------------------------------------------------------------------------------------------------------------------------------------------------------------------------------------------------------------------------------------------------------------------------------------------------------------------------------------------------------------------------------------------------------------------------------------------------------------------------------------------------------------------------------------------------------------------------------------------------------------------------------------------------------------------------------------------------------------|
| 1              | 123               | 1BA1, 1BA4, 1BA5, 1BA6, 1BA7, 1BA9, 1BA11, 1BB4, 1BB5, 1BB6, 1BB10, 1BB11, 1BC11, 1BC2, 1BC3, 1BC5, 1BD1, 1BD7, 1BD10, 1BE7, 1BF1, 2BA4, 2BA5, 2BA7, 2BA10, 2BB4, 2BB6, 2BB12, 2BC2, 2BC3, 2BC7, 2BC8, 2BC12, 2BD4, 2BD9, 2BD10, 2BE2, 2BE3, 2BE4, 2BE5, 2BE7, 2BE9, 2BF3, 2BF5, 2BF8, 2BF9, 2BF12, 2BG1, 3BA1, 3BA4, 3BA12, 3BB7, 3BB8, 3BC3, 3BC4, 3BD1, 3BE2, 3BE3, 3BE4, 3BE5, 3BE11, 3BF1, 3BF3, 3BF5, 3BG3, 3BG6, 3BF10, 4BA5, 4BA9, 4BB2, 4BB12, 4BC4, 4BC5, 4BC7, 4BC8, 4BC10, 4BD3, 4BD4, 4BD9, 5BA8, 5BA10, 5BB7, 5BC5, 5BC7, 5BC9, 5BD2, 5BD5, 5BD6, 5BD7, 6BA6, 6BB2, 6BC1, 6BC2, 6BC10, 6BC11, 6BMA8, 7BB1, 7BC5, 7BC9, 7BC12, 7BD5, 7BD6, 7BD8, 7BD11, 7BD12, 7BE3, 7BE4, 7BE11, 7BF4, 7BF6, 7BF10, 7BG3, 7BG4, 7BG10, 7BMA9, 8BA3, 8BA4, 8BA5, 8BA11, 8BB11, 8BB12, 8BC2, 8BC3 |
| 2              | 2                 | 1BA12, 1BD8                                                                                                                                                                                                                                                                                                                                                                                                                                                                                                                                                                                                                                                                                                                                                                                   |
| 3              | 5                 | 1BA2, 1BA8, 3BD4, 7BF3, 8BB5                                                                                                                                                                                                                                                                                                                                                                                                                                                                                                                                                                                                                                                                                                                                                                  |
| 4              | 19                | 1BB12, 1BE10, 2BA1, 2BA8, 3BA5, 3BC7, 3BG10, 4BA7, 4BA11, 4BD10, 4BD8, 5BA2, 5BB8, 5BB11, 6BA1, 6BC7, 7BG6, 8BB1, 8BB4                                                                                                                                                                                                                                                                                                                                                                                                                                                                                                                                                                                                                                                                        |
| 5              | 4                 | 1BB7, 1BB9, 7BC8, 7BG8                                                                                                                                                                                                                                                                                                                                                                                                                                                                                                                                                                                                                                                                                                                                                                        |
| 6              | 53                | 1BA10, 1BB8, 1BC4, 1BC6, 1BC9, 1BD12, 1BE2, 1BE4, 2BA9, 2BA11, 2BB8, 2BC9, 2BD8, 2BD12, 2BE1, 2BE10, 2BE12, 2BF10, 3BA3, 3BA7, 3BA8, 3BB5, 3BB9, 3BB10, 3BC6, 3BC12, 3BD5, 4BA6, 4BC11, 4BD6, 5BA4, 5BC6, 5BC10, 5BMA6, 6BA2, 6BA4, 6BA8, 6BB5, 6BC9, 7BA4, 7BA6, 7BA7, 7BB2, 7BB6, 7BD2, 7BF1, 7BF8, 7BF9, 7BG5, 7BG7, 8BA7, 8BA8, 8BC7                                                                                                                                                                                                                                                                                                                                                                                                                                                      |
| 7              | 7                 | 1BD4, 4BB10, 4BE1, 5BA12, 7BA8, 7BA9, 7BF5                                                                                                                                                                                                                                                                                                                                                                                                                                                                                                                                                                                                                                                                                                                                                    |
| 8              | 13                | 1BB3, 1BD5, 3BB4, 3BC11, 3BE10, 4BB7, 4BC1, 4BE2, 5BB3, 5BC11, 5BD8, 6BB1, 6BC3                                                                                                                                                                                                                                                                                                                                                                                                                                                                                                                                                                                                                                                                                                               |
| 9              | 20                | 1BC8, 1BE6, 1BE8, 1BE12, 2BA6, 2BC1, 2BD1, 2BF7<br>3BG4, 4BB11, 5BA9, 5BB9, 6BB4, 6BC8, 7BA3, 7BB8, 7BC11, 7BD7, 7BE10, 7BG2                                                                                                                                                                                                                                                                                                                                                                                                                                                                                                                                                                                                                                                                  |
| 10             | 7                 | 2BA3, 2BB2, 3BB2, 3BD12, 3BF12, 6BA11, 6BC12                                                                                                                                                                                                                                                                                                                                                                                                                                                                                                                                                                                                                                                                                                                                                  |
| 11             | 2                 | 2BB7, 3BG7                                                                                                                                                                                                                                                                                                                                                                                                                                                                                                                                                                                                                                                                                                                                                                                    |
| 12             | 7                 | 3BA10, 3BB3, 3BE1, 3BF9, 3BG5, 4BC6, 5BB2                                                                                                                                                                                                                                                                                                                                                                                                                                                                                                                                                                                                                                                                                                                                                     |
| 13             | 11                | 2BC5, 2BD6, 2BF4, 3BA2, 3BB1, 3BB6, 3BB12, 4BA10, 4BD12, 5BC12, 7BF12                                                                                                                                                                                                                                                                                                                                                                                                                                                                                                                                                                                                                                                                                                                         |
| 14             | 2                 | 3BC5, 3BG2                                                                                                                                                                                                                                                                                                                                                                                                                                                                                                                                                                                                                                                                                                                                                                                    |
| 15             | 5                 | 3BC8, 4BD11, 5BA5, 6BB3, 6BB11                                                                                                                                                                                                                                                                                                                                                                                                                                                                                                                                                                                                                                                                                                                                                                |
| 16             | 5                 | 2BG3, 3BC9, 3BD6, 3BE12, 6BA5                                                                                                                                                                                                                                                                                                                                                                                                                                                                                                                                                                                                                                                                                                                                                                 |
| 17             | 4                 | 3BD9, 3BE8, 5BB5, 5BC2                                                                                                                                                                                                                                                                                                                                                                                                                                                                                                                                                                                                                                                                                                                                                                        |
| 18             | 3                 | 2BC4, 3BF8, 6BC5                                                                                                                                                                                                                                                                                                                                                                                                                                                                                                                                                                                                                                                                                                                                                                              |

Table S5. Cont.

|    |    |                                                                                                                               |
|----|----|-------------------------------------------------------------------------------------------------------------------------------|
| 19 | 12 | 2BB10, 3BD7, 3BE7, 3BF7, 4BB5, 4BB6, 4BC12, 5BA7, 5BB12, 5BD1, 6BA9, 6BC6                                                     |
| 20 | 5  | 4BC2, 6BA3, 6BA12, 6BB8, 6BB9                                                                                                 |
| 21 | 2  | 4BB8, 4BD5                                                                                                                    |
| 22 | 2  | 1BMA2, 4BD7                                                                                                                   |
| 23 | 6  | 2BB1, 2BE6, 3BF4, 4BA3, 5BA1, 5BC8                                                                                            |
| 24 | 3  | 4BD2, 5BD4, 7BE9                                                                                                              |
| 25 | 2  | 5BA11, 6BA7                                                                                                                   |
| 26 | 11 | 2BB3, 2BC6, 2BF6, 5BD3, 6BB12, 7BB7, 7BD10, 7BE2, 7BE7, 7BE12, 7BG1                                                           |
| 27 | 2  | 5BC1, 6BB6                                                                                                                    |
| 28 | 3  | 6BB7, 7BA1, 7BA12                                                                                                             |
| 29 | 14 | 2BA2, 2BB9, 3BE6, 4BA1, 4BA8, 5BA6, 5BC3, 6BB10, 7BA10, 7BB5, 7BB11, 7BC4, 7BC6, 7BC10                                        |
| 30 | 2  | 7BD9, 7BE6                                                                                                                    |
| 31 | 6  | 1BD3, 8BA9, 8BB6, 8BB8, 8BC9, 8BC10                                                                                           |
| 32 | 4  | 5BB1, 7BE8, 7BF11, 8BB10                                                                                                      |
| 33 | 6  | 3BC10, 7BC1, 7BE5, 7BD1, 8BA6, 8BB2                                                                                           |
| 34 | 7  | 1BD9, 2BC10, 2BG2, 5BB6, 7BC2, 7BE1, 8BB3                                                                                     |
| 35 | 9  | 1BB2, 3BC1, 3BC2, 3BD11, 8BA10, 8BB7, 8BB9, 8BC1, 8BC5                                                                        |
| 36 | 20 | 1BC12, 1BE9, 1BMA1, 2BB5, 2BD5, 2BF2, 2BE11, 3BG1, 3BMA4, 4BA4, 4BC9, 5BB10, 5BMB2, 7BA2, 7BA5, 7BB3, 7BB9, 7BG9, 8BA12, 8BC8 |
| 37 | 4  | 3BF11, 4BC3, 7BB4, 7BC3                                                                                                       |
| 38 | 3  | 4BB3, 4BB4, 7BB10                                                                                                             |
| 39 | 2  | 2BF11, 4BA2                                                                                                                   |



**Figure S1.** Canonical correspondence analysis (CCA) of the relationship between culture-independent species level community composition (in black: OTUs identified using mothur) and sediment parameters (in red: % Organic Matter (OM), pH, P<sub>2</sub>O<sub>5</sub>, K<sub>2</sub>O, Ca and Mg) by site (in green: Black Beach (1B, 2B, 3B), Chance Harbour (4B, 5B, 6B), Pocologan (7B) and Mispic Bay (8B)).

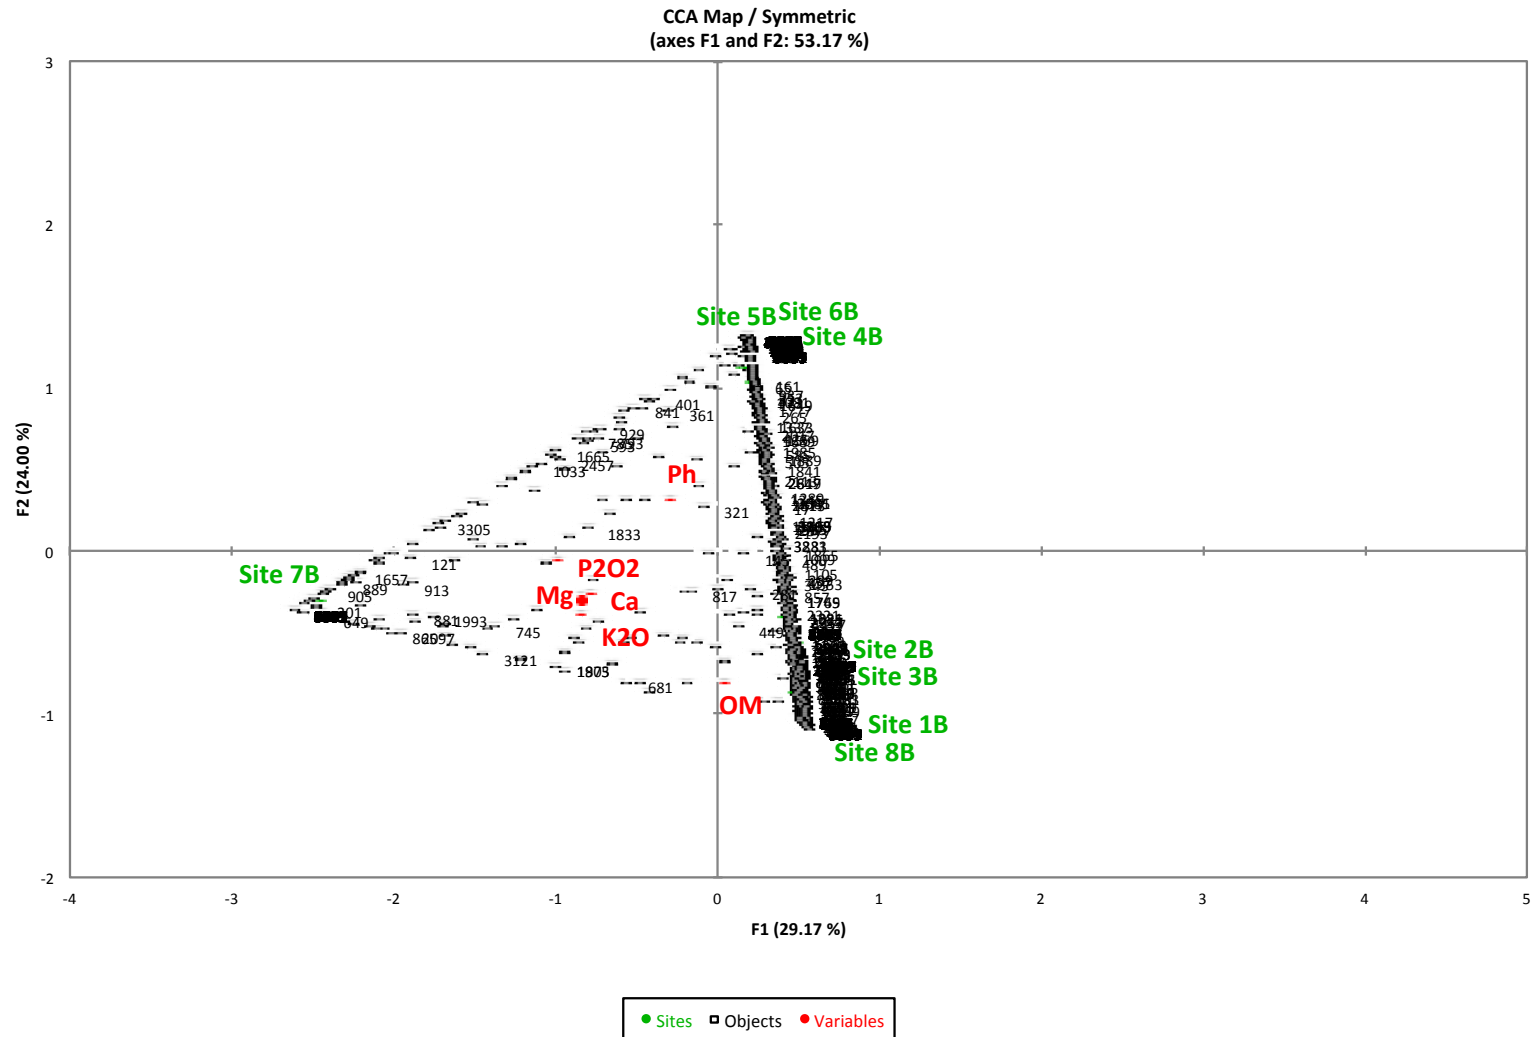

**Figure S2.** Canonical correspondence analysis (CCA) of the relationship between culture-independent species level community composition (in black: OTUs identified using mothur) and the sediment parameters (in red: B, Cu, Fe, Na, Zn, S) by site (in green: Black Beach (1B, 2B, 3B), Chance Harbour (4B, 5B, 6B), Pocologan (7B) and Mispec Bay (8B)).

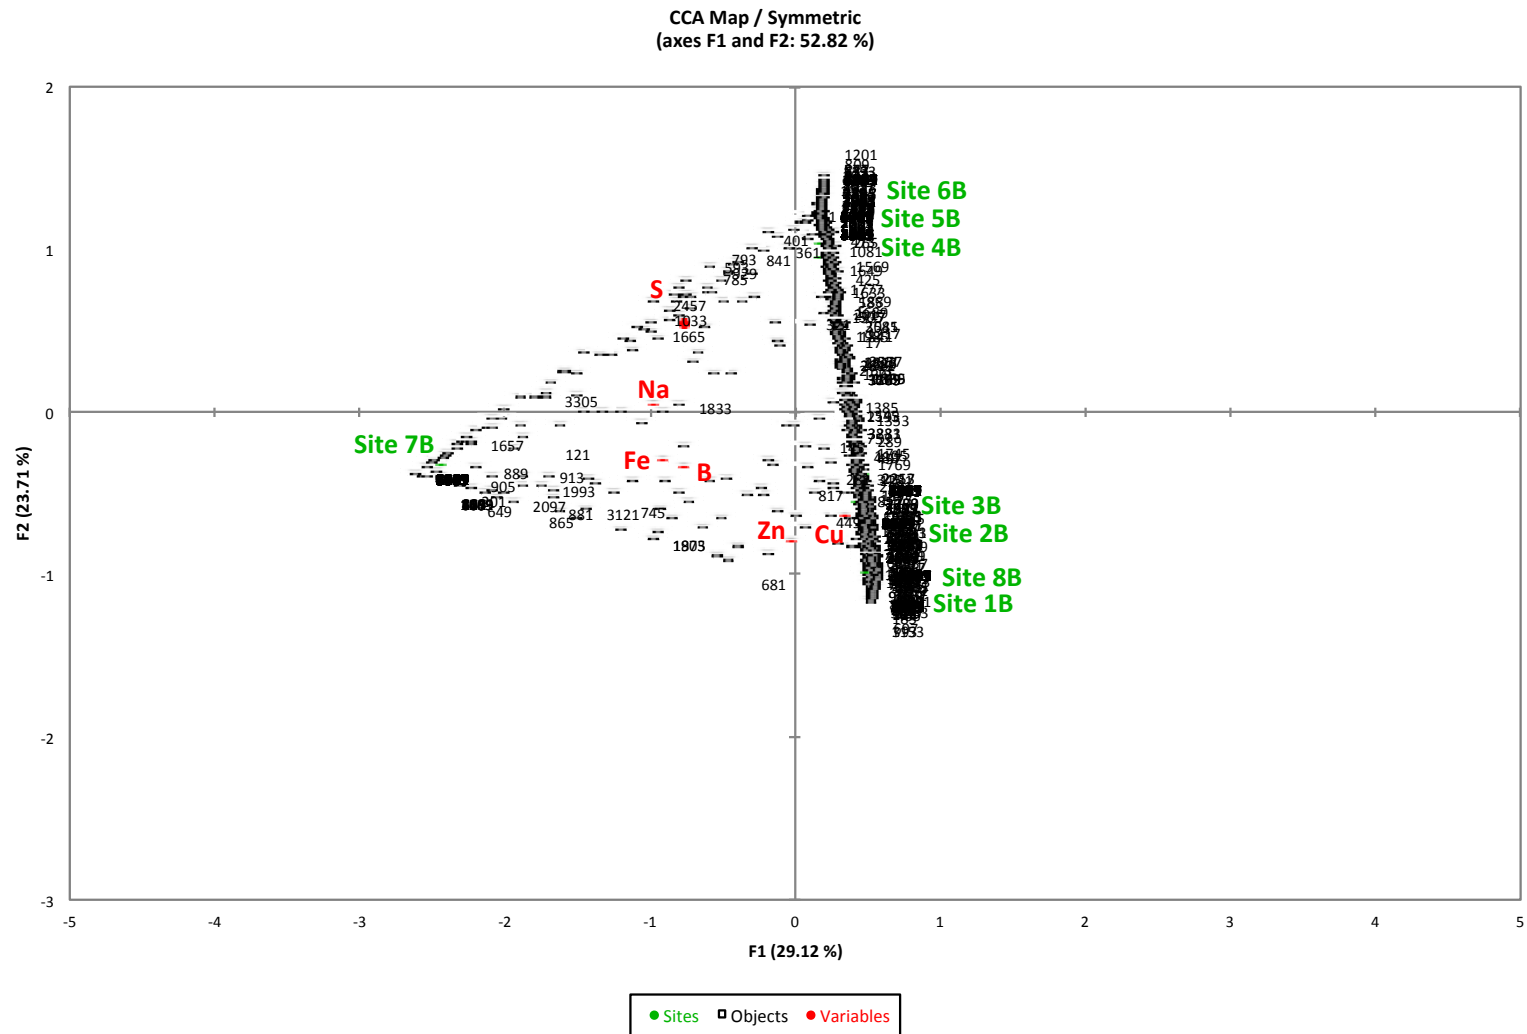

**Figure S3.** Canonical correspondence analysis (CCA) of the relationship between culture-independent species level community composition (in black: OTUs identified using mothur) and the sediment parameters (in red: sediment particle size: size 1 (<0.6 mm), size 2 (0.6–1 mm), size 3 (1–2 mm) and size 4 (>2 mm)) by site (in green: Black Beach (1B, 2B, 3B), Chance Harbour (4B, 5B, 6B), Pocologan (7B) and Misphec Bay (8B)).

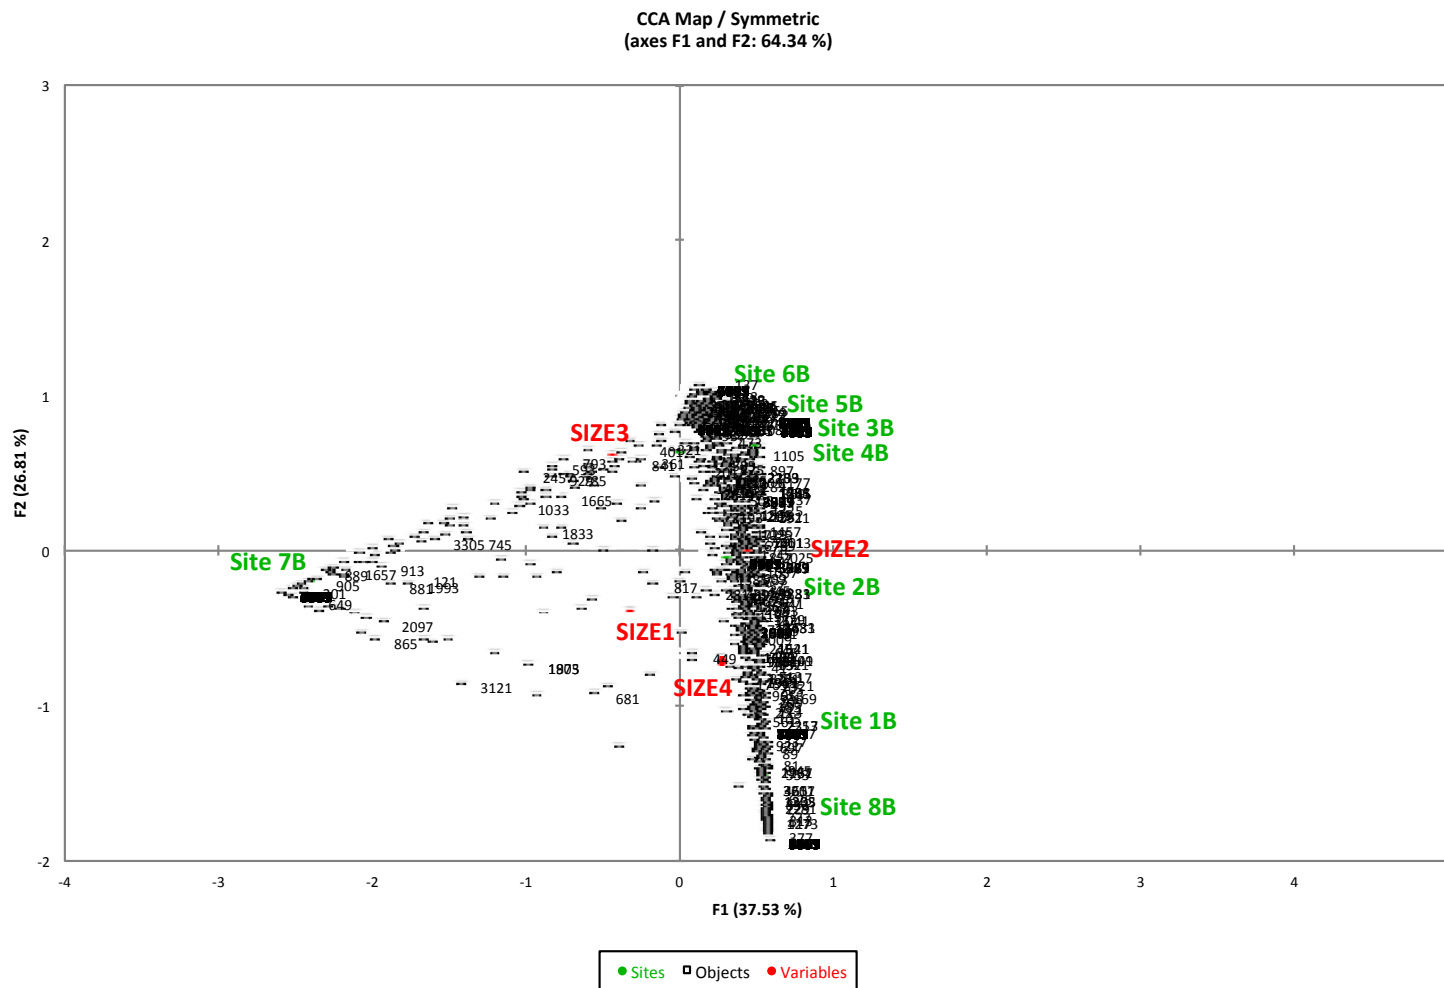

**Figure S4.** Canonical correspondence analysis (CCA) of the relationship between culture-dependent species level community composition (in black: OTUs based on 99% sequence identity) and the sediment parameters (in red: % Organic Matter (OM), pH, P<sub>2</sub>O<sub>5</sub>, K<sub>2</sub>O, Ca and Mg) by site (in green: Black Beach (1B, 2B, 3B), Chance Harbour (4B, 5B, 6B), Pocologan (7B) and Mispec Bay (8B)).

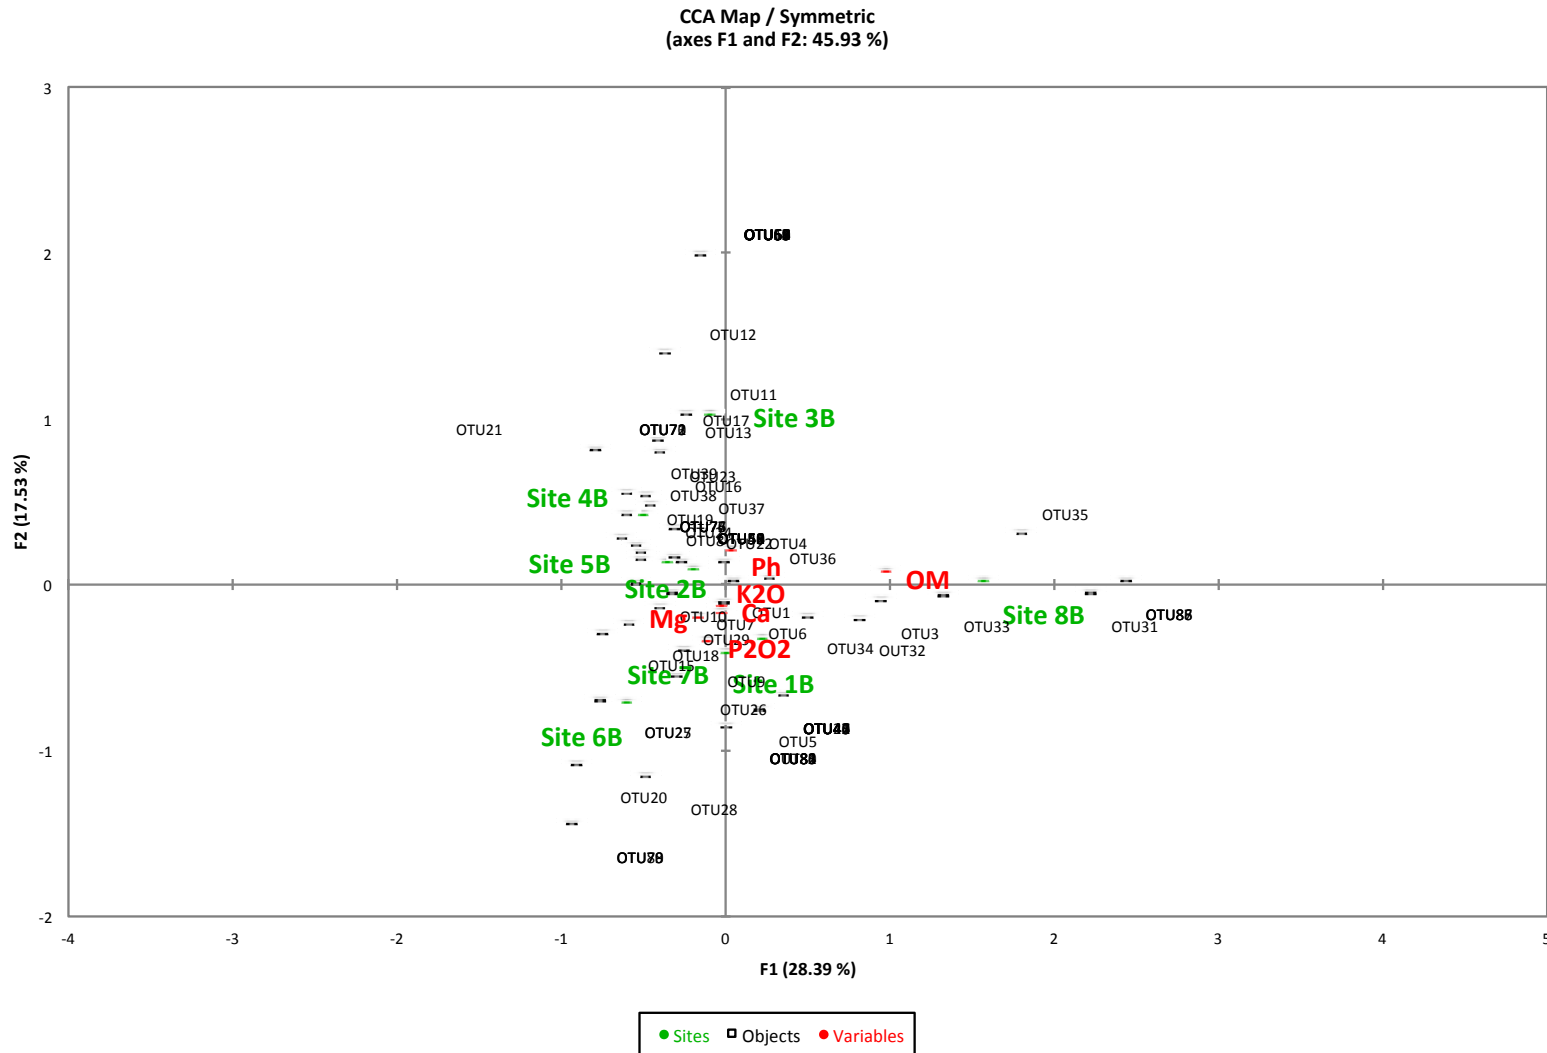

**Figure S5.** Canonical correspondence analysis (CCA) of the relationship between culture-dependent species level community composition (in black: OTUs based on 99% sequence identity) and the sediment parameters (in red: B, Cu, Fe, Na, Zn, S) by site (in green: Black Beach (1B, 2B, 3B), Chance Harbour (4B, 5B, 6B), Pocologan (7B) and Mispec Bay (8B)).

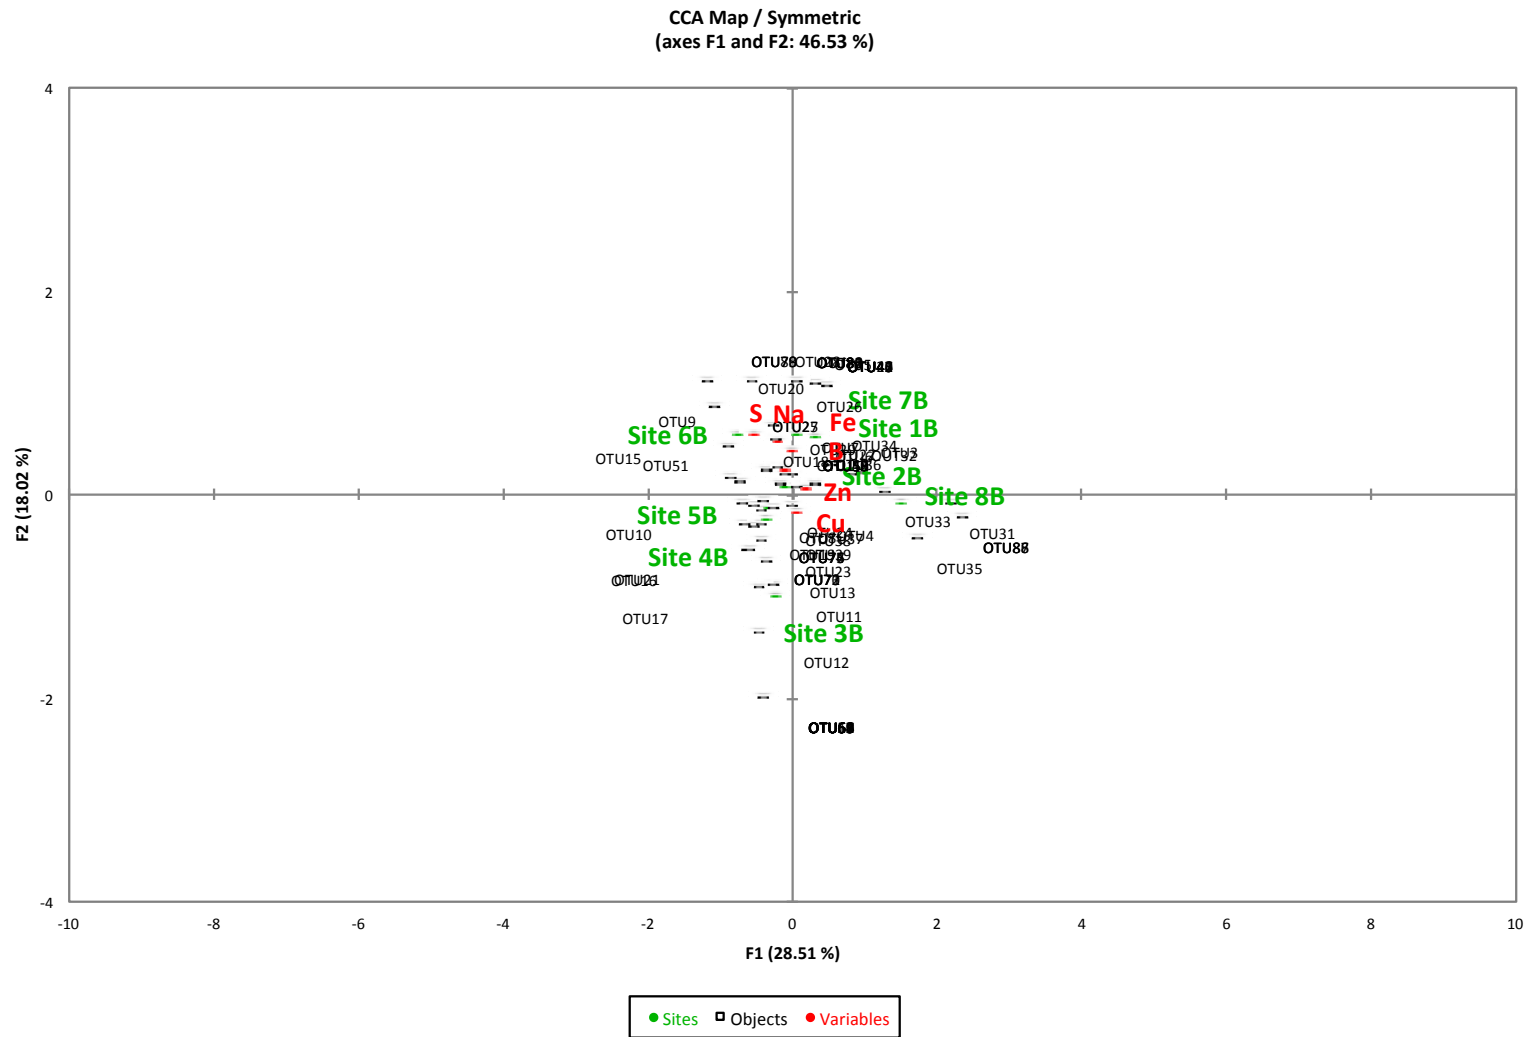

**Figure S6.** Canonical correspondence analysis (CCA) of the relationship between culture-dependent species level community composition (in black: OTUs based on 99% sequence identity) and the sediment parameters (in red: sediment particle size: size 1 (<0.6 mm), size 2 (0.6–1 mm), size 3 (1–2 mm) and size 4 (>2 mm)) by site (in green: Black Beach (1B, 2B, 3B), Chance Harbour (4B, 5B, 6B), Pocologan (7B) and Mispec Bay (8B)).

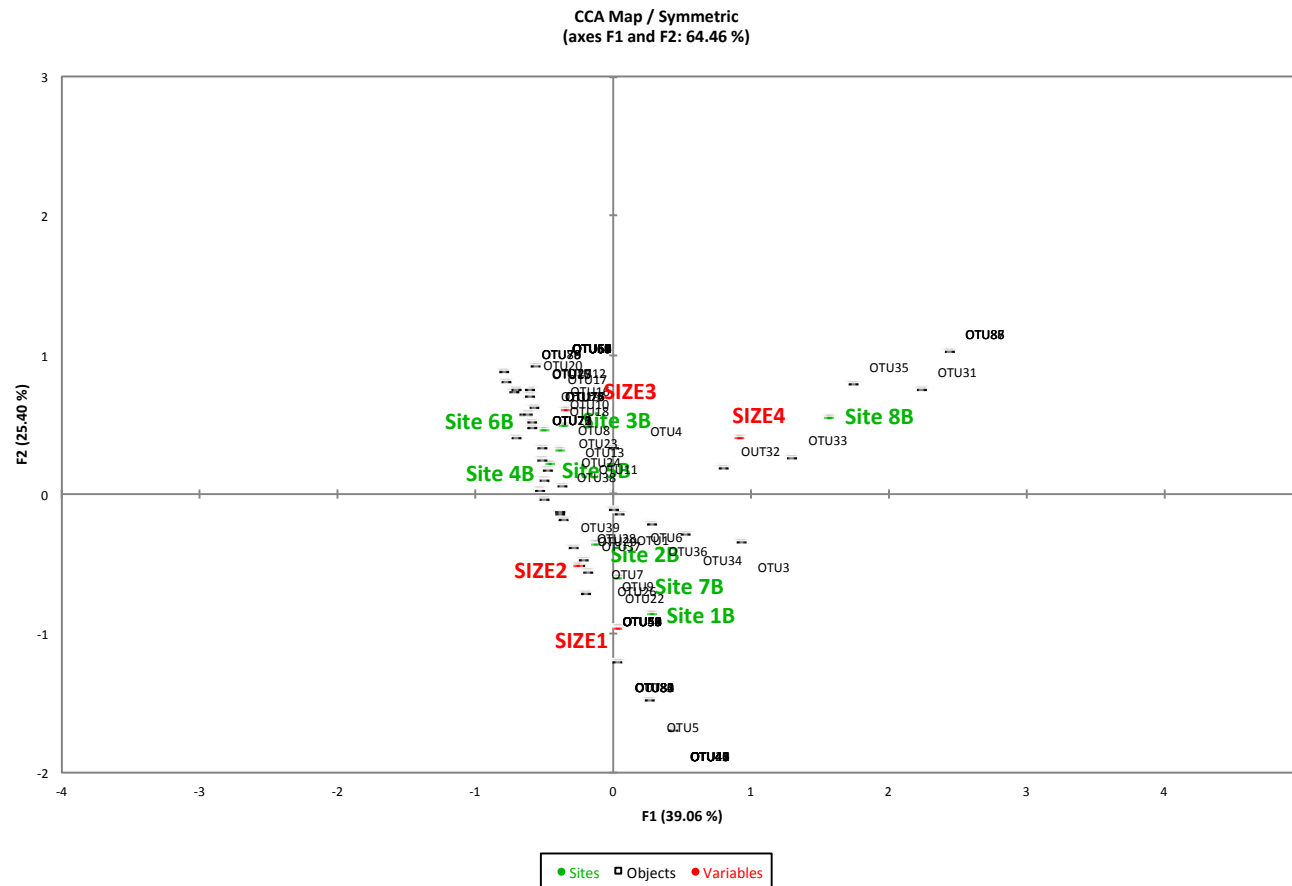

Supplement: marinedrugs-12-00899-s001.pdf [file marinedrugs-12-00899-s001.pdf]
